# Supplementary material
Source: HighWire-hosted journal article supplement (https://gh.bmj.com/content/6/1/e003702)
Supplement: inline-supplementary-material-4 [file inline-supplementary-material-4.pdf]

## Understanding abortion-related complications in health facilities: Results from WHO multi-country survey on abortion (MCS-A) across 11 African countries

### Supplementary File

1

#### Annex II. Legal status of abortion among 11 participating African countries<sup>1</sup>

| Legal Classification                                                                                                                                   | Country                                                               |
|--------------------------------------------------------------------------------------------------------------------------------------------------------|-----------------------------------------------------------------------|
| Law prohibits all abortion                                                                                                                             | None                                                                  |
| Unlawful abortion is prohibited or where there are only penalties for unlawful abortion, with no additional information provided about lawful abortion | Nigeria                                                               |
| Law allows or permits abortion only on one or more legal grounds                                                                                       | Benin, Burkina Faso, Congo, Chad, Ghana, Kenya, Malawi, Niger, Uganda |
| Law entitles a woman to abortion on request with no requirement for justification                                                                      | Mozambique                                                            |

<sup>1</sup> Johnson, B.R., Lavelanet, A.F. & Schlitt, S. Global Abortion Policies Database: a new approach to strengthening knowledge on laws, policies, and human rights standards. *BMC Int Health Hum Rights* 18, 35 (2018) doi:10.1186/s12914-018-0174-2

## References

1. Johnson BR, Jr., Mishra V, Lavelanet AF, Khosla R, Ganatra B. A global database of abortion laws, policies, health standards and guidelines. *Bull World Health Organ* 2017; **95**(7): 542-4. 2. Johnson BR, Lavelanet AF, Schlitt S. Global Abortion Policies Database: a new approach to strengthening knowledge on laws, policies, and human rights standards. *BMC International Health and Human Rights* 2018; **18**(1): 35.
