# Supplementary material
Source: HighWire-hosted journal article supplement (https://gh.bmj.com/content/6/1/e003702)
Supplement: inline-supplementary-material-5 [file inline-supplementary-material-5.pdf]

# Understanding abortion-related complications in health facilities: Results from WHO multi-country survey on abortion (MCS-A) across 11 African countries

## Supplementary File

### Annex V. National, sociodemographic and obstetric characteristics of ACASI study population by severity of abortion-related complications

|                                                           | Entire population<br>(N=13657) | ACASI<br>(N=3091) |
|-----------------------------------------------------------|--------------------------------|-------------------|
| <b>SOCIODEMOGRAPHIC AND OBSTETRIC</b>                     |                                |                   |
| <b>Age (in years)</b>                                     | <b>3051</b>                    | <b>13516</b>      |
| ≤19                                                       | 490 (16.1)                     | 2173 (16.1)       |
| 20 - 29                                                   | 1419 (46.5)                    | 6565 (48.6)       |
| ≥30                                                       | 1142 (37.4)                    | 132 (41.7)        |
| <b>Marital Status</b>                                     | <b>2966</b>                    | <b>12614</b>      |
| Single                                                    | 651 (21.9)                     | 2852 (22.6)       |
| Other than single                                         | 2315 (78.1)                    | 9762 (77.4)       |
| <b>Education</b>                                          | <b>2628</b>                    | <b>10485</b>      |
| No Education                                              | 437 (16.6)                     | 1791 (17.1)       |
| Some education                                            | 2191 (83.4)                    | 8694 (82.9)       |
| <b>Gainful occupation</b>                                 | <b>2750</b>                    | <b>11708</b>      |
| Yes                                                       | 1336 (48.6)                    | 5276 (45.1)       |
| <b>Previous pregnancies</b>                               | <b>3023</b>                    | <b>13264</b>      |
| 0                                                         | 816 (26.9)                     | 3584 (27.0)       |
| 1 or more                                                 | 2207 (73.0)                    | 9680 (72.9)       |
| <b>Previous abortions</b>                                 |                                |                   |
| 0                                                         | 1321 (61.3)                    | 6050 (64.1)       |
| 1 or more                                                 | 833 (38.7)                     | 3384 (35.9)       |
| <b>Gestational age (in weeks)*</b>                        |                                |                   |
| <13                                                       | 1707 (55.2)                    | 7716 (56.5)       |
| 13-28                                                     | 899 (29.1)                     | 3496 (25.6)       |
| Undetermined                                              | 485 (15.7)                     | 2445 (17.9)       |
| <b>Expulsion of products of conception before arrival</b> | <b>3081</b>                    | <b>13616</b>      |
| Yes                                                       | 1327 (43.1)                    | 5916 (43.5)       |

\*p-value <0.0001

## References

1. Johnson BR, Jr., Mishra V, Lavelanet AF, Khosla R, Ganatra B. A global database of abortion laws, policies, health standards and guidelines. *Bull World Health Organ* 2017; **95**(7): 542-4. 2. Johnson BR, Lavelanet AF, Schlitt S. Global Abortion Policies Database: a new approach to strengthening knowledge on laws, policies, and human rights standards. *BMC International Health and Human Rights* 2018; **18**(1): 35.
